# Supplementary material for: Smurf1 Silencing Using a LNA‐ASOs/Lipid Nanoparticle System to Promote Bone Regeneration
Source: PubMed Central journal article supplement — Stem Cells Transl Med. 2019 Oct 21;8(12):1306–17. doi: 10.1002/sctm.19-0145 (PMC6877774; doi:10.1002/sctm.19-0145), 2019-10-21
Supplement: SCT3-8-1306-s001.pdf [file SCT3-8-1306-s001.pdf]

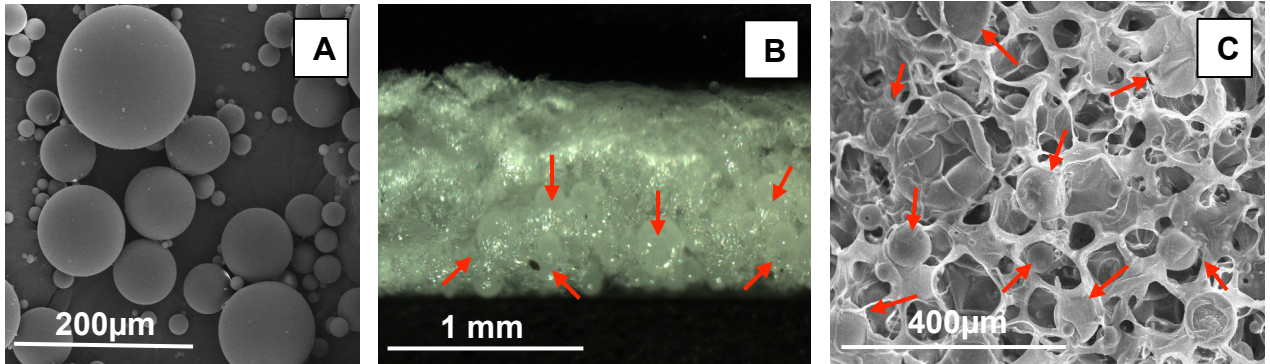

**Supplementary Figure 1. Scaffold structure.** Scanning Electron Microscope (SEM) image of the microspheres (A) Cross-section view of the scaffold, arrows indicate the microspheres dispersed in the alginate matrix, visualized by stereo microscope (B) and by SEM (C).

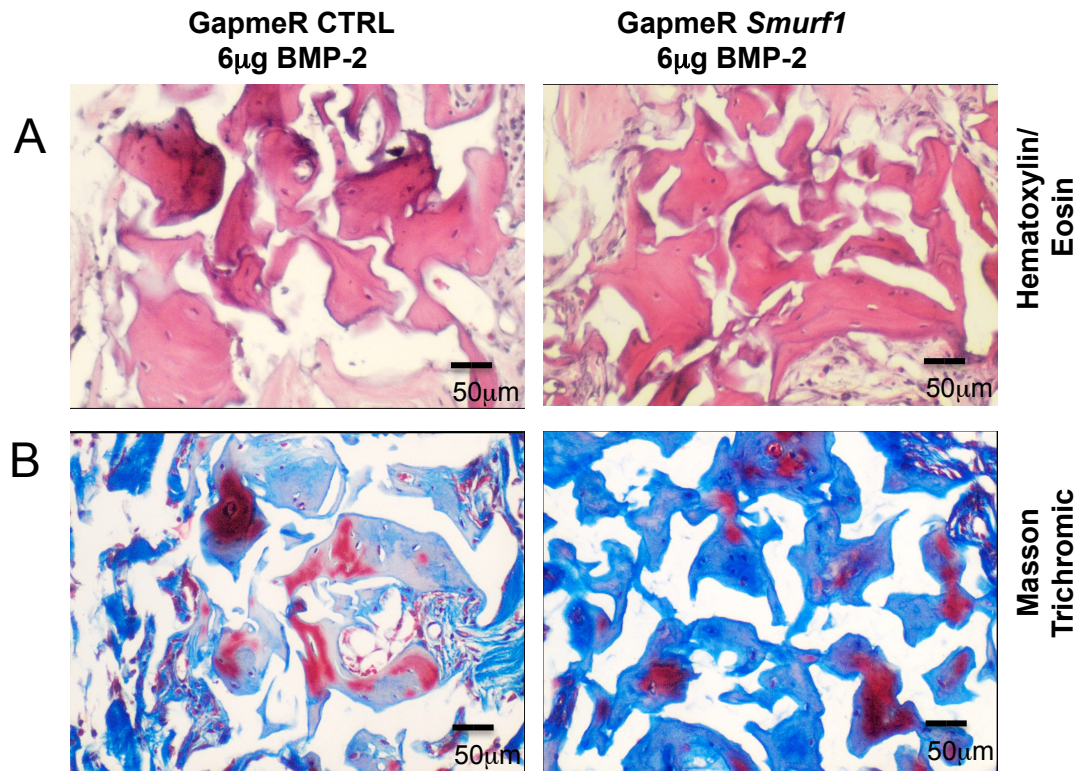

**Supplementary Figure 2. Histological analysis of bone formation in subdermal implants in rats** Pictures show histological analysis of sections obtained from decalcified implants. Hematoxylin/Eosin (**A**) and Masson–Goldner staining (**B**) showing mineralized matrix in light pink and light blue respectively.

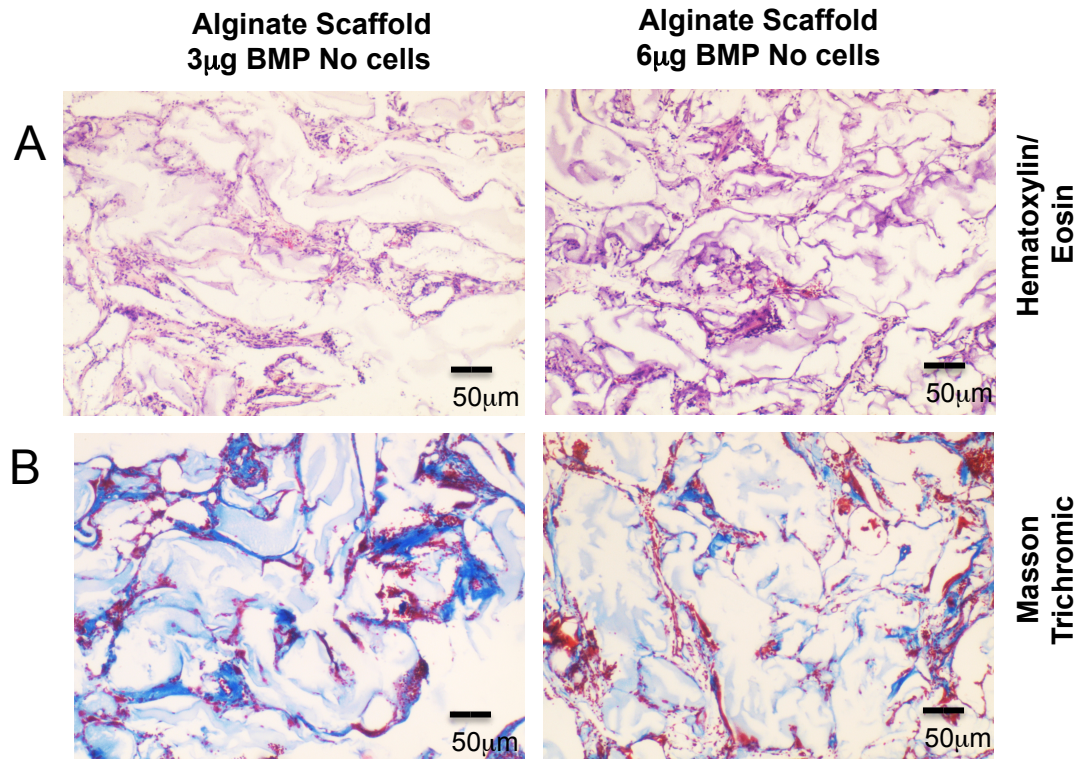

**Supplementary Figure 3. Histological analysis of bone formation in subdermal implants in rats** Pictures show histological analysis of sections obtained from decalcified implants. Hematoxylin/Eosin **(A)** and Masson–Goldner staining **(B)**.
